# Supplementary material
Source: MDPI journal article supplement (https://www.mdpi.com/2073-4441/13/24/3533)
Supplement: s1 [file s1]

## Supplementary Materials

**Table S1.** Study site locations of all burned and reference SNOTEL sites used in analyses for each snow-eco-region, including Alaska (AK), Arizona/New Mexico (AZ/NM), Cascades (CA), Northern Rockies (NR), Middle Rockies (MR), Southern Rockies (SR), Wasatch/Uinta (W/U), and Western Interior (WI). Also included is the SNOTEL site identification number (Site\_ID), State, Fire Year, Latitude, Longitude, Elevation, and burn severity (Severity) of forest fire which occurred during the period of record.

| Site Type | Region | Site_ID | State | Fire Year | Latitude | Longitude | Elevation | Severity |
|-----------|--------|---------|-------|-----------|----------|-----------|-----------|----------|
| Burned    | AK     | 947     | AK    | 2004      | 65.12    | −146.73   | 2000      | NA       |
| Burned    | AK     | 949     | AK    | 2004      | 65.08    | −145.87   | 1850      | L        |
| Burned    | AZ/NM  | 519     | AZ    | 2002      | 34.31    | −110.75   | 7640      | U        |
| Burned    | AZ/NM  | 902     | AZ    | 2011      | 33.69    | −109.22   | 7990      | U        |
| Burned    | AZ/NM  | 416     | AZ    | 2011      | 33.80    | −109.15   | 8400      | H        |
| Burned    | AZ/NM  | 511     | AZ    | 2011      | 33.65    | −109.31   | 9020      | U        |
| Burned    | AZ/NM  | 617     | AZ    | 2011      | 33.92    | −109.46   | 9200      | U        |
| Burned    | AZ/NM  | 1127    | AZ    | 2011      | 33.90    | −109.16   | 8500      | L        |
| Burned    | AZ/NM  | 866     | AZ    | 2011      | 33.76    | −109.48   | 7850      | L        |
| Burned    | AZ/NM  | 877     | AZ    | 2000      | 33.90    | −109.16   | 8500      | L        |
| Burned    | AZ/NM  | 595     | NM    | 2003      | 33.36    | −107.83   | 8500      | L        |
| Burned    | AZ/NM  | 1138    | NM    | 2005      | 36.18    | −108.95   | 9050      | L        |
| Burned    | AZ/NM  | 1034    | NM    | 2012      | 33.40    | −105.79   | 10280     | M        |
| Burned    | AZ/NM  | 757     | NM    | 2012      | 33.37    | −108.71   | 9000      | L        |
| Burned    | AZ/NM  | 1048    | NM    | 2013      | 33.01    | −107.87   | 9240      | U        |
| Burned    | AZ/NM  | 755     | NM    | 2014      | 32.92    | −108.15   | 8360      | H        |
| Burned    | CA     | 1258    | CA    | 2012      | 41.99    | −120.72   | 5680      | M        |
| Burned    | CA     | 977     | CA    | 2012      | 41.89    | −120.75   | 5170      | L        |
| Burned    | CA     | 706     | OR    | 1992      | 42.32    | −120.83   | 5720      | L        |
| Burned    | CA     | 756     | OR    | 2002      | 42.96    | −121.18   | 5740      | L        |
| Burned    | CA     | 526     | OR    | 2003      | 44.42    | −121.86   | 4790      | L        |
| Burned    | CA     | 815     | OR    | 2012      | 44.14    | −121.64   | 5690      | L        |
| Burned    | CA     | 800     | OR    | 2018      | 42.70    | −120.80   | 7080      | M        |
| Burned    | CA     | 515     | WA    | 2003      | 48.72    | −120.66   | 6490      | U        |
| Burned    | CA     | 824     | WA    | 2006      | 46.12    | −117.85   | 5530      | U        |
| Burned    | CA     | 507     | WA    | 2012      | 47.28    | −120.49   | 5390      | H        |
| Burned    | CA     | 699     | WA    | 2014      | 47.99    | −120.57   | 3590      | M        |
| Burned    | CA     | 644     | WA    | 2012      | 48.36    | −119.08   | 5010      | L        |
| Burned    | CA     | 1043    | WA    | 2015      | 48.86    | −118.40   | 4680      | H        |
| Burned    | CA     | 418     | WA    | 2017      | 47.02    | −121.46   | 5800      | H        |
| Burned    | CA     | 734     | WA    | 2017      | 47.38    | −121.06   | 4340      | L        |
| Burned    | MR     | 639     | ID    | 2018      | 44.84    | −114.27   | 7600      | L        |
| Burned    | MR     | 670     | WY    | 1988      | 45.01    | −110.01   | 7350      | U        |
| Burned    | MR     | 862     | WY    | 1988      | 45.05    | −109.91   | 8700      | U        |
| Burned    | MR     | 577     | WY    | 1988      | 44.21    | −110.67   | 7850      | L        |
| Burned    | MR     | 683     | WY    | 1988      | 44.73    | −109.91   | 9400      | U        |
| Burned    | MR     | 816     | WY    | 1988      | 44.37    | −110.58   | 7980      | U        |
| Burned    | MR     | 837     | WY    | 1988      | 44.15    | −110.22   | 9240      | U        |
| Burned    | MR     | 875     | WY    | 1988      | 40.82    | −106.75   | 9320      | H        |
| Burned    | MR     | 358     | WY    | 2007      | 44.68    | −107.58   | 9350      | M        |
| Burned    | MR     | 765     | WY    | 2012      | 42.49    | −110.53   | 8060      | L        |
| Burned    | MR     | 379     | WY    | 2013      | 43.70    | −109.67   | 8750      | H        |

|           |       |      |    |      |       |         |       |    |
|-----------|-------|------|----|------|-------|---------|-------|----|
| Burned    | MR    | 878  | WY | 2013 | 43.93 | −109.82 | 8350  | L  |
| Burned    | MR    | 460  | WY | 2018 | 43.13 | −110.20 | 7930  | L  |
| Burned    | NR    | 1053 | ID | 2003 | 48.72 | −116.46 | 3520  | M  |
| Burned    | NR    | 520  | ID | 2015 | 46.48 | −115.63 | 5810  | L  |
| Burned    | NR    | 510  | MT | 1994 | 48.31 | −114.84 | 5035  | L  |
| Burned    | NR    | 693  | MT | 2007 | 48.30 | −113.33 | 5930  | H  |
| Burned    | NR    | 414  | MT | 2003 | 47.08 | −112.73 | 6950  | M  |
| Burned    | NR    | 562  | MT | 2003 | 47.43 | −113.78 | 4750  | M  |
| Burned    | NR    | 413  | MT | 2003 | 47.06 | −112.60 | 5200  | M  |
| Burned    | SR    | 940  | CO | 2002 | 40.82 | −106.75 | 9320  | M  |
| Burned    | SR    | 827  | CO | 2002 | 40.00 | −107.24 | 9700  | H  |
| Burned    | SR    | 624  | CO | 2013 | 37.62 | −107.03 | 11250 | L  |
| Burned    | SR    | 461  | UT | 2002 | 39.31 | −109.53 | 8302  | M  |
| Burned    | SR    | 708  | NM | 2011 | 35.92 | −106.39 | 9500  | U  |
| Burned    | W/U   | 579  | UT | 2002 | 40.86 | −110.80 | 9133  | U  |
| Burned    | W/U   | 1269 | UT | 2003 | 37.98 | −110.79 | 9209  | NA |
| Burned    | W/U   | 907  | UT | 2008 | 37.52 | −112.27 | 8900  | U  |
| Burned    | W/U   | 390  | UT | 2017 | 37.66 | −112.74 | 9607  | L  |
| Burned    | W/U   | 1197 | UT | 2017 | 37.75 | −112.77 | 8692  | NA |
| Burned    | W/U   | 400  | UT | 2018 | 39.89 | −111.25 | 7837  | L  |
| Burned    | W/U   | 686  | UT | 2018 | 39.93 | −111.63 | 8044  | U  |
| Burned    | W/U   | 1280 | UT | 2018 | 39.92 | −111.72 | 7835  | U  |
| Burned    | WI    | 496  | ID | 1994 | 43.95 | −115.27 | 5690  | U  |
| Burned    | WI    | 740  | ID | 1994 | 45.19 | −115.97 | 6540  | H  |
| Burned    | WI    | 306  | ID | 2003 | 43.76 | −115.24 | 7580  | M  |
| Burned    | WI    | 439  | ID | 2007 | 44.55 | −115.56 | 6860  | L  |
| Burned    | WI    | 830  | ID | 2012 | 43.63 | −115.44 | 7770  | M  |
| Burned    | WI    | 450  | ID | 2013 | 43.60 | −114.67 | 8420  | M  |
| Burned    | WI    | 2029 | ID | 2015 | 43.29 | −116.84 | 5600  | L  |
| Burned    | WI    | 637  | ID | 2016 | 43.93 | −115.67 | 6100  | L  |
| Burned    | WI    | 445  | NV | 2012 | 41.97 | −118.19 | 6260  | M  |
| Burned    | WI    | 569  | NV | 2012 | 41.52 | −117.63 | 6395  | M  |
| Burned    | WI    | 1110 | NV | 2013 | 36.25 | −115.63 | 7860  | M  |
| Burned    | WI    | 573  | NV | 2018 | 41.78 | −116.03 | 6682  | L  |
| Burned    | WI    | 1146 | UT | 1986 | 39.35 | −112.33 | 7850  | U  |
| Burned    | WI    | 583  | UT | 2004 | 37.49 | −113.85 | 6065  | L  |
| Reference | AK    | 948  | AK | NA   | 65.25 | −146.15 | 2800  | NA |
| Reference | AK    | 951  | AK | NA   | 64.95 | −145.52 | 1640  | NA |
| Reference | AZ/NM | 310  | AZ | NA   | 33.98 | −109.50 | 9125  | NA |
| Reference | AZ/NM | 705  | AZ | NA   | 34.37 | −111.01 | 7930  | NA |
| Reference | AZ/NM | 1143 | AZ | NA   | 36.33 | −109.06 | 9200  | NA |
| Reference | AZ/NM | 486  | NM | NA   | 33.74 | −108.95 | 8000  | NA |
| Reference | CA    | 434  | OR | NA   | 44.52 | −122.09 | 3690  | NA |
| Reference | CA    | 552  | OR | NA   | 44.39 | −122.17 | 3520  | NA |
| Reference | CA    | 614  | OR | NA   | 44.59 | −121.97 | 2590  | NA |
| Reference | CA    | 619  | OR | NA   | 44.21 | −121.87 | 4770  | NA |
| Reference | CA    | 733  | OR | NA   | 44.44 | −121.95 | 3740  | NA |
| Reference | CA    | 794  | OR | NA   | 42.13 | −120.84 | 5770  | NA |
| Reference | CA    | 1010 | OR | NA   | 42.64 | −120.95 | 6180  | NA |
| Reference | CA    | 1166 | OR | NA   | 44.33 | −122.09 | 4720  | NA |
| Reference | CA    | 1167 | OR | NA   | 44.30 | −122.04 | 3270  | NA |

|           |     |      |    |    |       |         |       |    |
|-----------|-----|------|----|----|-------|---------|-------|----|
| Reference | CA  | 352  | WA | NA | 47.35 | −120.68 | 4240  | NA |
| Reference | CA  | 478  | WA | NA | 47.54 | −121.09 | 3430  | NA |
| Reference | CA  | 642  | WA | NA | 46.91 | −121.48 | 5410  | NA |
| Reference | CA  | 711  | WA | NA | 48.52 | −120.74 | 4890  | NA |
| Reference | CA  | 788  | WA | NA | 47.27 | −121.34 | 3850  | NA |
| Reference | CA  | 832  | WA | NA | 47.23 | −120.29 | 5480  | NA |
| Reference | CA  | 841  | WA | NA | 47.29 | −120.37 | 4330  | NA |
| Reference | CA  | 928  | WA | NA | 47.07 | −121.59 | 2250  | NA |
| Reference | CA  | 975  | WA | NA | 48.57 | −120.78 | 3930  | NA |
| Reference | CA  | 1068 | WA | NA | 47.16 | −121.42 | 4640  | NA |
| Reference | CA  | 1085 | WA | NA | 46.87 | −121.53 | 5240  | NA |
| Reference | CA  | 1171 | WA | NA | 48.07 | −120.85 | 2930  | NA |
| Reference | MR  | 480  | MT | NA | 45.06 | −109.94 | 9100  | NA |
| Reference | MR  | 670  | MT | NA | 45.01 | −110.01 | 7350  | NA |
| Reference | MR  | 862  | MT | NA | 45.05 | −109.91 | 8700  | NA |
| Reference | MR  | 309  | WY | NA | 44.80 | −107.84 | 9380  | NA |
| Reference | MR  | 326  | WY | NA | 44.94 | −109.57 | 9360  | NA |
| Reference | MR  | 377  | WY | NA | 44.79 | −107.53 | 7880  | NA |
| Reference | MR  | 451  | WY | NA | 44.57 | −107.30 | 8880  | NA |
| Reference | MR  | 472  | WY | NA | 44.65 | −109.78 | 9200  | NA |
| Reference | MR  | 499  | WY | NA | 44.13 | −110.83 | 7265  | NA |
| Reference | MR  | 555  | WY | NA | 43.25 | −110.02 | 7740  | NA |
| Reference | MR  | 585  | WY | NA | 43.50 | −109.75 | 9370  | NA |
| Reference | MR  | 597  | WY | NA | 43.17 | −110.14 | 8240  | NA |
| Reference | MR  | 661  | WY | NA | 43.11 | −109.95 | 8340  | NA |
| Reference | MR  | 751  | WY | NA | 44.50 | −107.43 | 9580  | NA |
| Reference | MR  | 764  | WY | NA | 44.13 | −110.67 | 6920  | NA |
| Reference | MR  | 779  | WY | NA | 42.53 | −110.66 | 9000  | NA |
| Reference | MR  | 798  | WY | NA | 44.72 | −107.40 | 8880  | NA |
| Reference | MR  | 818  | WY | NA | 44.81 | −107.41 | 6870  | NA |
| Reference | MR  | 1130 | WY | NA | 43.67 | −109.38 | 8400  | NA |
| Reference | NR  | 747  | ID | NA | 46.57 | −115.74 | 4600  | NA |
| Reference | NR  | 1142 | ID | NA | 46.50 | −115.80 | 3080  | NA |
| Reference | NR  | 667  | MT | NA | 47.27 | −113.76 | 6330  | NA |
| Reference | SR  | 426  | CO | NA | 40.17 | −107.06 | 9100  | NA |
| Reference | SR  | 467  | CO | NA | 40.85 | −106.97 | 8700  | NA |
| Reference | SR  | 717  | CO | NA | 40.11 | −107.29 | 10340 | NA |
| Reference | SR  | 839  | CO | NA | 37.72 | −107.26 | 9400  | NA |
| Reference | SR  | 840  | CO | NA | 37.49 | −106.84 | 10200 | NA |
| Reference | SR  | 1061 | CO | NA | 40.06 | −107.01 | 9080  | NA |
| Reference | W/U | 392  | UT | NA | 40.85 | −111.05 | 9171  | NA |
| Reference | W/U | 393  | UT | NA | 40.89 | −111.07 | 8208  | NA |
| Reference | W/U | 399  | UT | NA | 39.87 | −111.28 | 8975  | NA |
| Reference | W/U | 513  | UT | NA | 40.74 | −110.62 | 10885 | NA |
| Reference | W/U | 514  | UT | NA | 37.49 | −112.58 | 7792  | NA |
| Reference | W/U | 517  | UT | NA | 40.80 | −110.88 | 9130  | NA |
| Reference | W/U | 593  | UT | NA | 37.49 | −112.51 | 7465  | NA |
| Reference | W/U | 626  | UT | NA | 37.57 | −112.84 | 9827  | NA |
| Reference | W/U | 763  | UT | NA | 40.79 | −111.09 | 7631  | NA |
| Reference | W/U | 790  | UT | NA | 40.91 | −110.50 | 10158 | NA |
| Reference | W/U | 853  | UT | NA | 37.58 | −112.90 | 9203  | NA |

|           |     |      |    |    |       |         |       |    |
|-----------|-----|------|----|----|-------|---------|-------|----|
| Reference | W/U | 864  | UT | NA | 39.96 | −110.99 | 8641  | NA |
| Reference | W/U | 992  | UT | NA | 40.89 | −110.83 | 8777  | NA |
| Reference | W/U | 1135 | UT | NA | 40.98 | −110.85 | 8000  | NA |
| Reference | W/U | 1148 | UT | NA | 37.70 | −112.65 | 8350  | NA |
| Reference | W/U | 1154 | UT | NA | 37.68 | −112.86 | 10039 | NA |
| Reference | W/U | 1162 | UT | NA | 40.96 | −110.58 | 8869  | NA |
| Reference | W/U | 1163 | UT | NA | 40.88 | −110.54 | 9360  | NA |
| Reference | W/U | 1192 | UT | NA | 40.84 | −110.66 | 9632  | NA |
| Reference | W/U | 1248 | UT | NA | 37.60 | −112.93 | 8050  | NA |
| Reference | W/U | 1261 | UT | NA | 38.07 | −110.77 | 9410  | NA |
| Reference | WI  | 338  | ID | NA | 44.63 | −115.80 | 6560  | NA |
| Reference | WI  | 370  | ID | NA | 45.04 | −116.13 | 6250  | NA |
| Reference | WI  | 550  | ID | NA | 44.05 | −115.44 | 7070  | NA |
| Reference | WI  | 704  | ID | NA | 43.51 | −115.57 | 4800  | NA |
| Reference | WI  | 769  | ID | NA | 43.48 | −114.83 | 5740  | NA |
| Reference | WI  | 476  | NV | NA | 41.82 | −116.10 | 7031  | NA |
| Reference | WI  | 498  | NV | NA | 41.67 | −117.57 | 8503  | NA |
| Reference | WI  | 548  | NV | NA | 41.55 | −116.01 | 7377  | NA |
| Reference | WI  | 549  | NV | NA | 41.51 | −116.01 | 8424  | NA |
| Reference | WI  | 1111 | NV | NA | 36.32 | −115.70 | 8890  | NA |
| Reference | WI  | 1112 | NV | NA | 36.31 | −115.68 | 8626  | NA |
| Reference | WI  | 1207 | NV | NA | 41.89 | −115.86 | 6915  | NA |
| Reference | WI  | 1079 | OR | NA | 45.98 | −117.95 | 5580  | NA |
| Reference | WI  | 1065 | UT | NA | 37.50 | −113.94 | 6763  | NA |
| Reference | WI  | 984  | WA | NA | 46.18 | −117.54 | 5700  | NA |

**Table S2.** Burn severity intensifies forest fire effect on snow-water storage and snowmelt. Mean difference and significance of t-tests comparing normalized pre-fire vs. post-fire snow metrics of burned SNOTEL sites of high severity burned forest, moderate severity burned forest, low severity burned forest and unburned forest within the burn perimeter, for the western US and each snow-eco-region. Significance of the difference between the normalized pre- and post-fire snow metrics for the West and each region are shown as asterixis (\*\*\*\*  $p$ -value < 0.001, \*\*\*  $p$ -value < 0.01, \*\*  $p$ -value < 0.05, \*  $p$ -value < 0.1).

| Region              | $\Delta$ PSD (days) |          | $\Delta$ Peak SWE (mm) |           | $\Delta$ SDD (days) |            | $\Delta$ SMR (mm/day) |          |
|---------------------|---------------------|----------|------------------------|-----------|---------------------|------------|-----------------------|----------|
|                     | 5 Years             | 10 Years | 5 Years                | 10 Years  | 5 Years             | 10 Years   | 5 Years               | 10 Years |
| West—H<br>N = 10    | 11.1                | 7.2      | −63.5 *                | −85.9 *** | −16.2 ****          | −13.4 **** | 0.7                   | 2.7 ***  |
| West—M<br>N = 17    | 2.4                 | 2.1      | −22.4                  | −23.2     | −19.7 ****          | −14.8 **** | −0.6                  | 0.4      |
| West—L<br>N = 29    | 9.1 *               | 6.8      | −35.6                  | −36.0 *   | −3.8                | −4.0       | −0.3                  | 0.1      |
| West—U<br>N = 19    | −1.0                | −2.3     | −21.3                  | −17.5     | −7.1 ***            | −7.9 ****  | −0.6                  | 0.5      |
| Alaska—H<br>N = 1   | −9.1                | 11.8     | −47.8 *                | −34.3 **  | −12.4 **            | 8.5        | 0.3                   | −13.1    |
| Alaska—L<br>N = 1   | −13.4               | −2.4     | −22.9                  | −16.1     | −11.3 **            | −4.4       | 1.3                   | −0.3     |
| Cascades—H<br>N = 3 | −3.1                | −4.9     | −22.0                  | −39.2     | −17.4 ****          | −16.3 **** | −3.1 *                | −1.7 *** |
| Cascades—M<br>N = 3 | −1.9                | −2.4     | 19.0                   | −22.0     | −10.6 *             | −14.2 ***  | −2.3 *                | −2.1 **  |
| Cascades—L          | 29.5                | 25.5 **  | −84.9                  | −100.9 ** | −1.4 **             | −1.5 **    | −0.3                  | 0.8      |

|                                |                  |                 |                   |                  |                   |                 |              |            |
|--------------------------------|------------------|-----------------|-------------------|------------------|-------------------|-----------------|--------------|------------|
| N = 7<br>Cascades—U<br>N = 2   | 4.5              | 1.7             | 21.6              | −73.4            | −1.1              | −1.9            | −4.3         | −1.4       |
| North Rockies—<br>H<br>N = 1   | 6                | 18.1            | −80.4             | −279.8 ***       | −0.9 **           | −16.2 ****      | −0.4         | 4.0 *      |
| North Rockies—<br>M<br>N = 4   | −11              | −7.8            | −24.6*            | −9.3 *           | −21.3 **          | −16.1 ***       | −1.7         | −1.0       |
| North Rockies—<br>L<br>N = 2   | −10.6 *          | −8.2 **         | −82.5             | −51.9 **         | −17.2 **          | −10.3 *         | 0.4          | 0.8        |
| Middle Rock-<br>ies—H<br>N = 2 | −18.5            | −23.0 **        | −52.5             | 4.8              | −14 *             | −13.3 **        | 2.0          | 2.1 **     |
| Middle Rock-<br>ies—M<br>N = 1 | 7.9              | 6               | 118.6             | 58.8             | 7.3               | 2.5             | −3.4         | −2.7       |
| Middle Rock-<br>ies—L<br>N = 5 | 12.5             | 9.2             | −54.5             | −13.6            | −1.6              | −2.4            | 1.0          | −0.6       |
| Middle Rock-<br>ies—U<br>N = 5 | 2.4              | −1.1            | 3.0               | 54.7             | −1.2              | −2.9            | 0.9          | −1.3       |
| South Rockies—<br>H<br>N = 1   | −18.5 *          | −16.0 *         | −226.8 *          | −195.2 *         | −14.1 ***         | −13.7 *         | 7.6 *        | 5.3 *      |
| South Rockies—<br>M<br>N = 2   | −10.3–<br>18.5 * | −1.4–16.0<br>** | −25.9–<br>226.8 * | 30.1–195.4<br>** | −9.6–14.1<br>**** | −4.0–13.7<br>** | −0.77.6<br>* | −1.15.3 ** |
| South Rockies—<br>L<br>N = 1   | 0.3              | −6.3 **         | −93.9 *           | −49.1 *          | 1.2               | 3.5 **          | 1.1          | 2.4 *      |
| South Rockies—<br>U<br>N = 1   | −13.3            | −12.9 *         | −82.3             | −79.1 *          | −20.6 ****        | 21.7 ****       | 0.5          | 0.3        |
| West Interior—<br>M<br>N = 6   | 4.9              | 7.4             | −49.3             | −71.0            | −29.0 ****        | −20.4 ****      | 0.2          | 1.3        |
| West Interior—L<br>N = 5       | 2.7              | −3.4            | 54.0 **           | 19.4             | 0.5               | −9.6            | 1.6          | −0.3       |
| West Interior—<br>U<br>N = 2   | −4.5             | −9.1 **         | 116.6 **          | 15.9             | 8.6               | 0.04            | 0.1          | 2.1        |
| Wasatch<br>Uinta—L<br>N = 3    | 2.7              | 0.2             | 38.6              | −2.1             | −4.1              | −7.8            | −1.2         | 0.9        |
| Wasatch<br>Uinta—U<br>N = 4    | 3.3              | −4.0            | 14.4              | 3.1              | 2.3               | −1.6            | −2.5         | 4.4        |
| AZ NM—H                        | 71.8             | 59.3            | −86.5 **          | −63.8 ***        | −31.4 ****        | −9.0            | 0.7          | 2.3        |

|                        |      |      |            |           |            |            |        |       |  |
|------------------------|------|------|------------|-----------|------------|------------|--------|-------|--|
| N =2                   |      |      |            |           |            |            |        |       |  |
| AZ NM—M<br>Single Site | 53.2 | 19.3 | −94.1 *    | −100.1    | −20.5 *    | −22.6 ***  | −2.0   | 0.4   |  |
| AZ NM—L<br>N = 6       | 3.8  | 4.1  | −51.1 **** | −27.3 *** | −7.8 *     | −1.9       | −0.9   | −1.3  |  |
| AZ NM—U<br>N = 5       | −5.7 | −1.4 | −95.1 ***  | −63.7 *** | −20.3 **** | −17.9 **** | 2.0 ** | 1.3 * |  |

**Table S3.** Normalized change values for micro-meteorological variables, including precipitation, temperature, soil moisture, and solar radiation at 78 SNOTEL stations located in burned forests for 5-years (5 Yrs) and 10-years (10 Yrs) following fire. (\*\*\*\*  $p$ -value < 0.001, \*\*\*  $p$ -value < 0.01, \*\*  $p$ -value < 0.05, \*  $p$ -value < 0.1).

| Region                | Δ Precipitation<br>(mm) |             | Δ Temperature<br>(°C) |             | Δ Soil Moisture<br>2 in. (%) |           | Δ Soil Moisture<br>8 in. (%) |           | Δ Soil Moisture<br>20 in. (%) |             | Δ Solar Radiation<br>(W m <sup>−2</sup> ) |               |
|-----------------------|-------------------------|-------------|-----------------------|-------------|------------------------------|-----------|------------------------------|-----------|-------------------------------|-------------|-------------------------------------------|---------------|
|                       | 5 Yrs                   | 10 Yrs      | 5 Yrs                 | 10 Yrs      | 5 Yrs                        | 10 Yrs    | 5 Yrs                        | 10 Yrs    | 5 Yrs                         | 10 Yrs      | 5 Ys                                      | 10 Ys         |
| West                  | −0.070                  | −0.063      | 0.433 ****            | 0.228 **    | −4.484                       | −7.324 ** | −4.481                       | −7.612 ** | −7.500                        | −19.112 *** | −1.316 *                                  | 1121.481 **** |
| Alaska                | −0.488 ****             | −0.348 **** | −5.970 **             | −2.581 **   |                              |           |                              |           |                               |             |                                           |               |
| AZ NM                 | −0.202 *                | −0.242 **** | 1.252 ****            | −1.784 **   |                              |           |                              |           |                               |             |                                           |               |
| Cascades              | −0.058                  | −162 *      | 0.492 *               | 0.6312 **** |                              |           |                              |           |                               |             |                                           |               |
| Northern<br>Rockies   | 0.049 *                 | 0.031       | 0.442 ***             | 1.089 ****  |                              |           |                              |           |                               |             |                                           |               |
| Middle<br>Rockies     | −0.126                  | −0.056      | −0.540 ****           | −0.577 **** |                              |           |                              |           |                               |             |                                           |               |
| Southern<br>Rockies   | −0.293 **               | −0.19 *     | 2.906 ****            | 3.209 ****  |                              |           |                              |           |                               |             |                                           |               |
| Western In-<br>terior | 0.148 ***               | 0.069 **    | 0.838 ****            | 0.770 ****  |                              |           |                              |           |                               |             |                                           |               |
| Wasatch<br>Uinta      | −0.006 *                | −0.0680     | −1.08 ****            | −0.786 **** |                              |           |                              |           |                               |             |                                           |               |

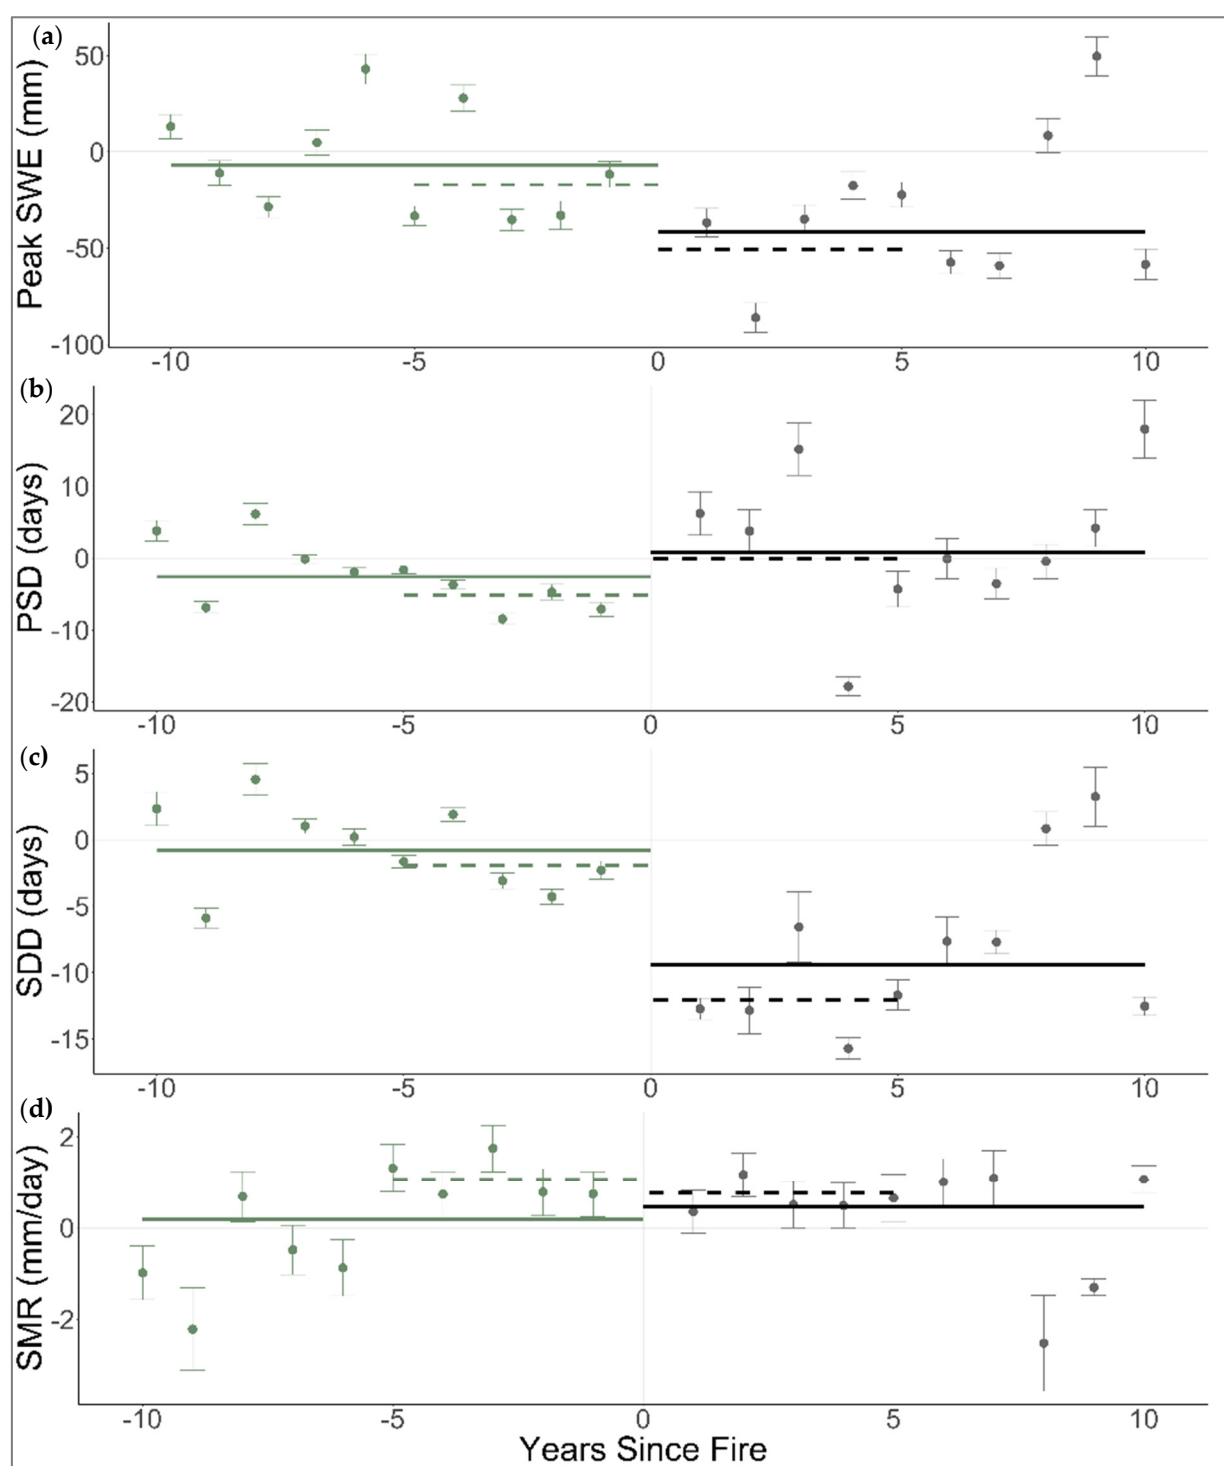

**Figure S1.** Forest fires decrease snow-water storage and advance snowmelt across the West. The annual mean for each year since fire (fire age) for the four pre- and post-fire snow accumulation and snowmelt metrics shown for all 78 burned SNOTEL sites. Standard error shown in error bars. Five year pre- and post-fire averages are shown as dotted line. Ten year pre- and post-fire averages are shown as solid grey line. Snow metrics include (a) peak snow water equivalent (Peak SWE, mm), (b) peak SWE date (PSD, date), (c) snow disappearance date (SDD, date), and (d) snowmelt rate (SMR, mm/melt days). Subset plots show a box plot for pre- and post-fire median snow metrics and mean snow metrics as black x. Significance of the difference between the pre- and post-fire snow metrics for all burned SNOTEL sites across the west and Alaska are shown as asterixis.
